# Supplementary material for: Response surface methodology as a powerful tool to optimize the synthesis of polymer-based graphene oxide nanocomposites for simultaneous removal of cationic and anionic heavy metal contaminants
Source: Royal Society of Chemistry journal article supplement (doi:10.1039/c7ra00750g), 2017-01-01
Supplement: c7ra00750g1.pdf [file c7ra00750g1.pdf]

# Response Surface Methodology as a powerful tool to optimize the synthesis of polymer-based graphene oxide nanocomposites for simultaneous removal of cationic and anionic heavy metal contaminants

Jem Valerie D. Perez<sup>a,b</sup>, Enrico T. Nadres<sup>b</sup>, Hang Ngoc Nguyen<sup>b</sup>, Maria Lourdes P. Dalida<sup>a</sup>, and Debora F. Rodrigues<sup>b\*</sup>

## Supporting Information

### Characterization of GO

Raman spectroscopy was used to study the structural changes and configurations of graphite and GO, as shown in SI Figure S1 (b). The G band is assigned to first-order scattering of the  $E_{2g}$  from the  $sp^2$  hybridized carbon while the D bands is due to the defects or structural imperfections present on the graphite plane<sup>36, 37</sup>, both are used to characterize graphene-based materials. Characteristic G peak at  $1580\text{ cm}^{-1}$  is observed for graphite, with an almost absent D peak suggesting no defects on the carbon basal plane. On the other hand, G and D peaks at  $1602$  and  $1350\text{ cm}^{-1}$ , respectively, are observed for GO, which are consistent with the well-known GO Raman peaks. The large D peak of GO denotes the significant presence of many functional groups formed.<sup>37</sup>

To investigate the functional groups present on the synthesized GO, FTIR analyses were performed. As shown in SI Figure S1 (c), graphite was successfully oxidized as indicated by the characteristic peaks at  $3385$ ,  $1728$ ,  $1628$ , and  $1053\text{ cm}^{-1}$  present in the IR spectrum of GO. These peaks are assigned to the O-H stretching of the hydroxyl groups, C=O stretching of the carboxyl groups, C=C on the hexagonal plane, and C-O of the epoxide groups, respectively.<sup>35, 36</sup> The presence of these functional groups confirms that GO was synthesized successfully.

Finally, XPS analysis was also performed to investigate surface composition and to further confirm the FTIR results. SI Figure S2 (a) shows wide scan spectra of graphite and GO, where a significant increase in

the O1s peak of GO is observed. Calculated C/O atomic concentration ratios of 43.4 and 1.6 for graphite and GO, respectively, confirms the successful oxidation of graphite. Furthermore, SI figure S2 (b) shows the deconvolution of the C1s core spectrum of GO. Three peaks can be observed at binding energies of 284.8 eV (C-C/C=C), 286.9 eV (C-O), and 288.5 eV (C=O)<sup>51</sup>, which are in good agreement with the functional groups observed from the FTIR analysis.

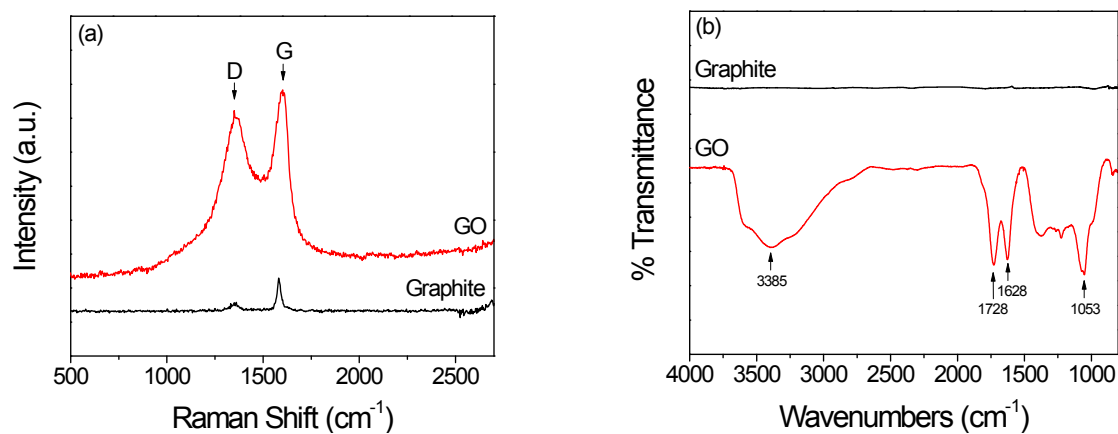

Figure S1. (a) Raman, and (b) FTIR spectra of graphite and GO

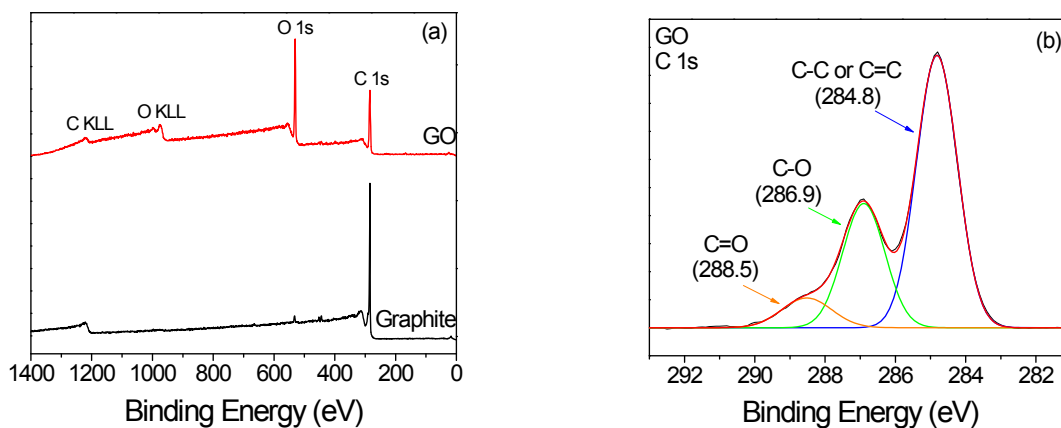

Figure S2. XPS (a) wide scan spectra of graphite and GO and (b) C1s core spectrum of GO

## Data, ANOVA, and Residual Diagnostics of RSM Models

Table S1. Experimental Design Matrix with Actual and Predicted Responses

| Run | X <sub>1</sub> , PEI concentration (%) | X <sub>2</sub> , GO concentration (ppm) | X <sub>3</sub> , GLA concentration (%) | Y <sub>1</sub> , % Cr (VI) Removal |           | Y <sub>2</sub> , % Cu (II) Removal |           |
|-----|----------------------------------------|-----------------------------------------|----------------------------------------|------------------------------------|-----------|------------------------------------|-----------|
|     |                                        |                                         |                                        | Actual                             | Predicted | Actual                             | Predicted |
| 1   | 1.00                                   | 500.00                                  | 1.50                                   | 84.0824                            | 84.5506   | 61.9981                            | 59.0063   |
| 2   | 1.50                                   | 1000.00                                 | 1.50                                   | 78.6517                            | 79.3383   | 59.9883                            | 64.1957   |
| 3   | 2.00                                   | 1500.00                                 | 1.50                                   | 89.1386                            | 88.6704   | 79.6470                            | 77.2674   |
| 4   | 1.50                                   | 500.00                                  | 2.50                                   | 84.2697                            | 84.3867   | 52.8630                            | 52.2379   |
| 5   | 1.50                                   | 1500.00                                 | 0.50                                   | 77.5281                            | 77.3174   | 76.1392                            | 76.1535   |
| 6   | 2.00                                   | 1000.00                                 | 2.50                                   | 88.2022                            | 87.5702   | 69.0138                            | 65.3095   |
| 7   | 1.50                                   | 1000.00                                 | 1.50                                   | 79.9625                            | 79.3383   | 62.1442                            | 64.1957   |
| 8   | 2.00                                   | 500.00                                  | 1.50                                   | 83.5206                            | 83.7547   | 57.9421                            | 63.5373   |
| 9   | 1.50                                   | 1500.00                                 | 2.50                                   | 85.9551                            | 86.8680   | 67.5157                            | 65.9679   |
| 10  | 1.50                                   | 500.00                                  | 0.50                                   | 75.6554                            | 74.8361   | 68.8311                            | 62.4235   |
| 11  | 2.00                                   | 1000.00                                 | 0.50                                   | 77.1536                            | 78.0197   | 75.0064                            | 75.4951   |
| 12  | 1.00                                   | 1500.00                                 | 1.50                                   | 84.8315                            | 84.5974   | 73.2525                            | 72.7364   |
| 13  | 1.00                                   | 1000.00                                 | 0.50                                   | 76.2172                            | 76.3811   | 69.1965                            | 70.9641   |
| 14  | 1.00                                   | 1000.00                                 | 2.50                                   | 86.3296                            | 85.9316   | 59.0383                            | 60.7785   |
| 15  | 1.50                                   | 1000.00                                 | 1.50                                   | 79.4007                            | 79.3383   | 61.8884                            | 64.1957   |

Table S2. ANOVA for Cr (VI) removal

| Source                        | Sum of Squares | df | Mean Square | F-value | p-value<br>Prob > F |                 |
|-------------------------------|----------------|----|-------------|---------|---------------------|-----------------|
| Model                         | 278.79         | 9  | 30.98       | 37.94   | 0.0004              | Significant     |
| x <sub>1</sub> (PEI)          | 5.37           | 1  | 5.37        | 6.58    | 0.0504              |                 |
| x <sub>2</sub> (GO)           | 12.31          | 1  | 12.31       | 15.08   | 0.0116              |                 |
| x <sub>3</sub> (GLA)          | 182.43         | 1  | 182.43      | 223.42  | < 0.0001            |                 |
| x <sub>1</sub> x <sub>2</sub> | 5.93           | 1  | 5.93        | 7.26    | 0.0431              |                 |
| x <sub>1</sub> x <sub>3</sub> | 0.22           | 1  | 0.22        | 0.27    | 0.6265 <sup>n</sup> |                 |
| x <sub>2</sub> x <sub>3</sub> | 8.767E-003     | 1  | 8.767E-003  | 0.011   | 0.9215 <sup>n</sup> |                 |
| x <sub>1</sub> <sup>2</sup>   | 47.57          | 1  | 47.57       | 58.26   | 0.0006              |                 |
| x <sub>2</sub> <sup>2</sup>   | 22.45          | 1  | 22.45       | 27.49   | 0.0033              |                 |
| x <sub>3</sub> <sup>2</sup>   | 3.35           | 1  | 3.35        | 4.10    | 0.0988              |                 |
| Residual                      | 4.08           | 5  | 0.82        |         |                     |                 |
| Lack of Fit                   | 3.22           | 3  | 1.07        | 2.48    | 0.3003              | Not significant |
| Pure Error                    | 0.87           | 2  | 0.43        |         |                     |                 |
| Cor Total                     | 282.88         | 14 |             |         |                     |                 |

<sup>n</sup> not significant

Table S3. ANOVA for Cu (II) removal

| Source                        | Sum of Squares | df | Mean Square | F-value | p-value<br>Prob > F |                 |
|-------------------------------|----------------|----|-------------|---------|---------------------|-----------------|
| Model                         | 771.54         | 9  | 85.73       | 8.68    | 0.0142              | Significant     |
| x <sub>1</sub> (PEI)          | 41.06          | 1  | 41.06       | 4.16    | 0.0971              |                 |
| x <sub>2</sub> (GO)           | 377.03         | 1  | 377.03      | 38.16   | 0.0016              |                 |
| x <sub>3</sub> (GLA)          | 207.49         | 1  | 207.49      | 21.00   | 0.0059              |                 |
| x <sub>1</sub> x <sub>2</sub> | 27.30          | 1  | 27.30       | 2.76    | 0.1573 <sup>n</sup> |                 |
| x <sub>1</sub> x <sub>3</sub> | 4.34           | 1  | 4.34        | 0.44    | 0.5369 <sup>n</sup> |                 |
| x <sub>2</sub> x <sub>3</sub> | 13.49          | 1  | 13.49       | 1.36    | 0.2954 <sup>n</sup> |                 |
| x <sub>1</sub> <sup>2</sup>   | 68.21          | 1  | 68.21       | 6.90    | 0.0467              |                 |
| x <sub>2</sub> <sup>2</sup>   | 24.42          | 1  | 24.42       | 2.47    | 0.1768 <sup>n</sup> |                 |
| x <sub>3</sub> <sup>2</sup>   | 21.72          | 1  | 21.72       | 2.20    | 0.1983 <sup>n</sup> |                 |
| Residual                      | 49.40          | 5  | 9.88        |         |                     |                 |
| Lack of Fit                   | 46.63          | 3  | 15.54       | 11.20   | 0.0830              | Not significant |
| Pure Error                    | 2.77           | 2  | 1.39        |         |                     |                 |
| Cor Total                     | 820.95         | 14 |             |         |                     |                 |

<sup>n</sup> not significant

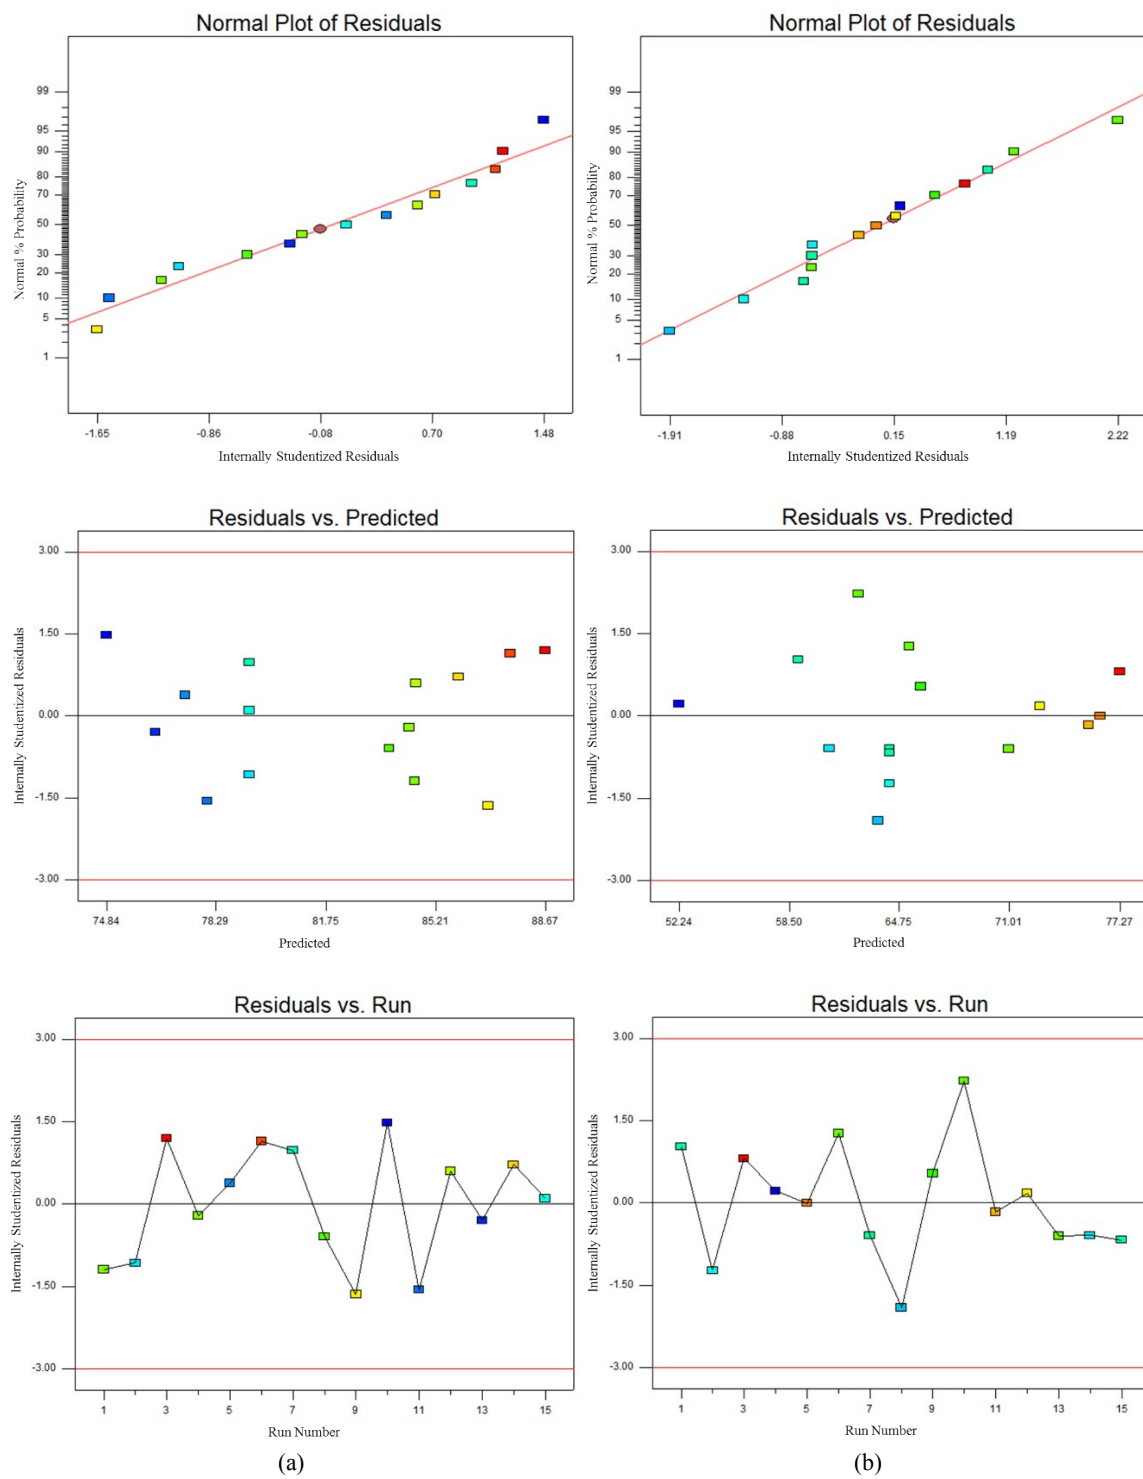

Figure S3. Residual plots for (a) Cr (VI) and (b) Cu (II) response

## Macro-image and chemical stability of CS-PEI-GO beads and other control beads

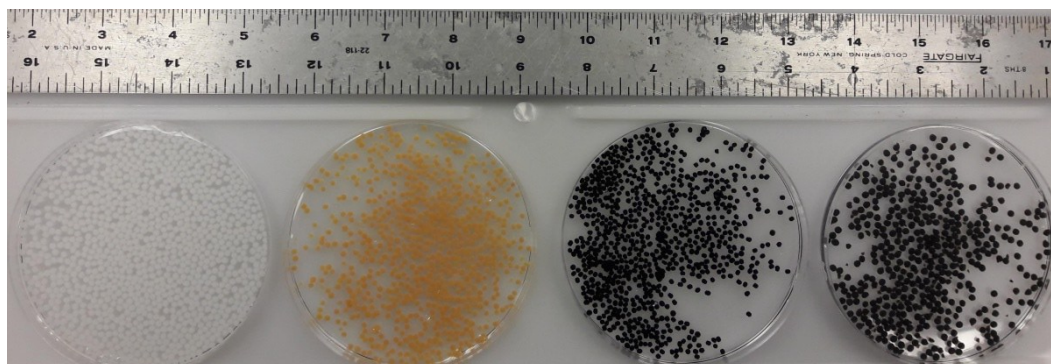

Figure S4. Spherical CS-PEI-GO beads of about 3 mm in diameter. We were able to synthesize stable CS, CS-PEI, CS-GO and CS-PEI-GO by crosslinking with glutaraldehyde.

### Chemical Stability

Solubility tests with different solvents were performed and the results proved that the beads are insoluble in different acidic and basic solutions, as shown in Table S4. The good chemical stability of the beads can be attributed to the successful crosslinking reaction between GLA and the amine groups present in the beads. This stability over a wide pH range is favorable for the potential applicability of the beads to different

types of wastewaters, as well as the possibility of regeneration of the beads using different desorption agents.

Table S4. Solubility tests of CS-PEI-GO beads in different solutions

| <b>Solution</b>      | <b>Remarks</b> |
|----------------------|----------------|
| 0.1 M HCl            | Insoluble      |
| 1 M HCl              | Insoluble      |
| 0.1 M NaOH           | Insoluble      |
| 1 M NaOH             | Insoluble      |
| 5% acetic acid (v/v) | Insoluble      |
